1  
2  
3  
4  
5  
6  
7  
8  
9  
10  
11  
12  
13  
14  
15  
16  
17  
18  
19  
20  
21  
22

White Matter Connectometry Among Individuals with Self-Reported Family History of Drug  
and Alcohol Use Disorders

Abigail B. Waters (Corresponding Author), awaters2@su.suffolk.edu, 703-975-3449<sup>a</sup>

Kayle S. Sawyer, kslays@bu.edu, 617-875-5967<sup>b, c, d, e</sup>

David A. Gansler, dgansler@suffolk.edu, 617-305-6397<sup>a</sup>

a. Department of Psychology, Suffolk University, Boston, MA, USA

b. Department of Anatomy & Neurobiology, Boston University School of Medicine, Boston,  
MA, USA

c. VA Boston Healthcare System, Boston, MA, USA

d. Athinoula A. Martinos Center for Biomedical Imaging, Massachusetts General Hospital,  
Harvard Medical School, Charlestown, MA, USA

e. Sawyer Scientific, LLC, Boston, MA, USA

Counts: abstract (250), manuscript (4708), references (38), tables (1), figures (2), supplementary  
tables (8), supplementary figure (1)

RUNNING HEAD: WHITE MATTER CONNECTOMETRY

Keywords: connectometry; family history of alcohol and substance use; white matter

## WHITE MATTER CONNECTOMETRY

### 1 **Abstract**

2 Heredity is an important risk factor for alcoholism. Several studies have been conducted on small  
3 groups of alcohol naïve adolescents which show lowered fractional anisotropy of frontal white  
4 matter in FH+ groups. We sought to compare large FH+ and FH- groups using white matter  
5 connectometry, as opposed to the previously used global tractography method, as it is more  
6 sensitive to regional variability. Imaging and behavioral data from the Human Connectome  
7 Project (WU-MINN HCP 1200) was used. Groups of participants were positive (n=109) and  
8 negative (n=109) for self-reported drug and alcohol use disorders in at least one parent. Groups  
9 were matched on gender, age, education, current alcohol usage, and alcohol use disorders  
10 (AUD). Connectometry was performed on diffusion MRI in DSI-Studio using q-space  
11 diffeomorphic reconstruction, and multiple regression was completed with 5000 permutations.  
12 Analyses showed decreased major tract (>40 mm) connectivity in the FH+ group in left inferior  
13 longitudinal fasciculus, bilateral cortico-striatal pathway, left cortico-thalamic pathway, and  
14 corpus callosum, compared to the FH- group. For cognitive tasks related to reward processing,  
15 inhibition, and monitoring, there were a number of interactions, such that the relationship  
16 between identified networks and behavior differed significantly between groups. Positive self-  
17 report of family history of alcoholism was associated with decreased connectivity in reward  
18 signaling pathways, controlling for alcohol consumption and AUD. This is the first  
19 connectometry study of FH+, and extends the neural basis of the hereditary diathesis of  
20 alcoholism beyond that demonstrated with global tractography. Regions associated with FH+ are  
21 similar to those associated with AUD.

22

## WHITE MATTER CONNECTOMETRY

### 1 **Introduction**

2 Family history of drug and alcohol abuse is highly associated with more severe, more  
3 recurrent alcohol dependence subtypes (Moss *et al.* 2007) and substance use disorders  
4 (Merikangas & McClair 2012), which remain a critical global health concern and disease burden  
5 (Whiteford *et al.* 2013). The impact of family history is further supported by extensive research  
6 in twin studies, demonstrating a genetic conferral of vulnerability when first-degree relatives  
7 have history of drug and alcohol problems (Walters 2002; Agrawal & Lynskey 2008). What  
8 remains a topic of continued exploration are the *specific mechanisms* of biological vulnerability  
9 in this population and how they relate to clinically relevant behaviors that interact with  
10 environmental stressors. Identifying brain structures underlying functional systems that differ  
11 among individuals with family history may help to explain how vulnerabilities are conferred, and  
12 identify critical targets and periods of intervention.

13 Identifying aspects of brain white matter structural connectivity vulnerabilities may be  
14 especially helpful, given that the developmental trajectory of these structures see the largest  
15 periods of growth when risk for alcohol and drug first use is highest (Bava & Tapert 2010).  
16 Longitudinal comparisons between young children with a family history of substance use  
17 disorders and healthy controls (Corral *et al.* 2003) show persistent neuropsychological deficits on  
18 a task of set-shifting in the presence of reinforcement (e.g., Wisconsin Card Sort Task) at three-  
19 year follow up. These findings underscore the clinical importance of examining biological  
20 vulnerabilities in reward processing pathways, given the longstanding effects on cognition. A  
21 study of alcohol-naive adolescents (Herting *et al.* 2011) has identified decreased integrity of  
22 white matter microstructure in the anterior limb of the internal capsule and superior longitudinal  
23 fasciculus associated with family history of drug and alcohol problems. These structural

## WHITE MATTER CONNECTOMETRY

1 differences were significantly associated with reduced contra-lateral, fronto-cerebellar  
2 connectivity during reward-based decision making task performance, executive monitoring, and  
3 inhibition. A second study in a similar population found that reduced integrity of white matter in  
4 the inferior longitudinal fasciculus and optic radiations mediated group differences between  
5 those with and without family history on a task of reward processing (Herting *et al.* 2010). There  
6 have been consistent findings for decreased fronto- cortical and striatal white matter (i.e., corona  
7 radiata, corpus callosum, thalamic radiation, occipitofrontal fasciculus) when positive family  
8 history is defined as any substance use behaviors (Acheson *et al.* 2014) among adolescents and  
9 young adults. In a single study (Squeglia *et al.* 2014), high functioning alcohol-naïve early  
10 adolescents with positive family history showed increased white matter integrity across  
11 interhemispheric, association, and fronto-subcortical projection fibers. Although these findings  
12 may seem contradictory, in early adolescence accelerated maturation of these pathways has been  
13 associated with risk taking behaviors (Berns *et al.* 2009), and may indicate general dysregulation  
14 of growth trajectories within this population. While there have been discrepancies among studies  
15 when identifying specific tracts, individuals with positive family history consistently show  
16 effects on white matter integrity in reward processing circuits.

17       Taken together, this suggests that the biological differences between those with and  
18 without a family history of chemical dependency (i.e., drug and alcohol addiction) precede both  
19 onset of substance use and the maturation of white matter. This may reflect different  
20 developmental trajectories for those with and without family history of drug and alcohol  
21 disorders, and what remains unclear is whether these differences reflect white matter  
22 development that is slowed or stunted; essentially, do these vulnerabilities persist into  
23 adulthood? Therefore, examining white matter at a developmental stage where it is expected to

## WHITE MATTER CONNECTOMETRY

1 be more mature may better characterize which differences are most impactful. Acheson and  
2 colleagues (2014) compared the white matter microstructure in healthy controls and individuals  
3 with positive family history (FH) across two age groups: youth (ages 10-14;  $N = 80$ ) and young  
4 adults (ages 18-30;  $N = 25$ ). While there were fewer significant findings among adults,  
5 suggesting a slowed trajectory, differences in diffusion protocols, demographic variables, and  
6 sample size prevented the direct comparison of groups or testing of age effects. Further  
7 exploration regarding the impact of family history on white matter in young adulthood is  
8 warranted in light of these limitations.

9       Traditional tractography in white matter studies utilize fiber tracking algorithms and  
10 “end-to-end” measurements of white matter integrity (Hagmann *et al.* 2010). This means that  
11 anisotropy measures (e.g., fractional anisotropy) are generated through the length of a tract, and  
12 only using fibers that connect to both identified ends. Typically, these measures are considered a  
13 reflection of the integrity of white matter tracts, and communicate the degree to which water is  
14 differentially restricted within a *single* direction. However, fractional anisotropy cannot  
15 differentiate between axonal architecture and myelin, especially when fibers cross within the  
16 same voxel (Soares *et al.* 2013). In contrast, a local connectome analysis measures the  
17 connectivity between *adjacent* voxels within white matter bundles, defined by the density of the  
18 diffusing spins, and shows changes in tract compactness or axonal density (Yeh *et al.* 2016). To  
19 generate the local connectomes used in group connectometry, image reconstruction maintains the  
20 spin distribution function (Yeh *et al.* 2010, 2011) which has a number of advantages.

21       Findings in adolescent samples have additionally been limited by the high presence of  
22 crossing fibers in these cortico-striatal regions, which may mask specific subcortical white  
23 matter structures when examining the average integrity along an entire tract. *Group*

## WHITE MATTER CONNECTOMETRY

1 *connectometry* analyses can characterize variability within white matter tracts in the context of a  
2 local connectome, and identify clinically meaningful differences. Because it is not restricted by  
3 predetermined end points, this approach reduces noise from unrelated white matter branches.  
4 inflammation, and edema (Zhang *et al.* 2013). Additionally, the maintenance of spin directions in  
5 reconstruction mean that SDF based measures are better able to distinguish crossing fibers, and  
6 less impacted by partial volume effects, which are particularly salient when examining potential  
7 differences in cortico-striatal pathways implicated in reward processing (Rolls 2000), and dense  
8 connections between cortex and the corpus callosum. *In vivo* comparisons between traditional  
9 diffusion measurements (i.e., fractional anisotropy) and SDF based measures (i.e., quantitative  
10 anisotropy), show a reduction in false tract identification of approximately 50% (Yeh *et al.*  
11 2014). Its increased sensitivity, compared to region-of-interest approaches, mean that it is  
12 particularly well suited to identify underlying vulnerabilities in populations where there may not  
13 yet be observable behavioral differences.

14 To our knowledge, this is the first group connectometry study investigating the effect of  
15 family history on SDF based measurements of white matter. We have chosen this approach  
16 because we believe that the density based measurements described above will be better able to  
17 characterize vulnerabilities conferred by parental drug and alcohol abuse disorders. By  
18 examining this relationship in adults, we hope to better characterize vulnerability during more  
19 advanced white matter development. Additionally, we will investigate the relevance of our  
20 findings as they relate to cognition in order to characterize the clinical impact of these findings.

21 To answer these questions, we present the following hypotheses:

22 *Hypothesis 1.* Compared to the individuals without family history (FH-), the individuals with  
23 family history (FH+) will have decreased connectivity along ventral tractography implicated in

## WHITE MATTER CONNECTOMETRY

1 reward or inhibitory processes (i.e., cortico-striatal and fronto-cerebellar), as measured by  
2 measures of spin distribution function.

3 *Hypothesis 2.* The relationship between measures of tract connectivity and clinically relevant  
4 behaviors (i.e., reward processing/impulsivity, cognitive flexibility/monitoring, inhibition) will  
5 be stronger in the FH+ group, compared to the FH- group.

## 6 **Methods**

### 7 **Participants**

8 The current study utilized data from the Human Connectome Project (WU-MINN HCP  
9 1200 Subjects data release), an open-access data initiative which provides comprehensive  
10 imaging, behavioral, and genetic data for 1200 healthy subjects aged 22-35. Each research  
11 participant was administered the same research protocol and scanned on the same machine. The  
12 HCP excludes individuals with documented neuropsychiatric disorders, neurologic disorders,  
13 diabetes, high blood pressure, premature birth, and severe symptoms associated with substance  
14 use (Van Essen *et al.* 2013). Participants were excluded from present analyses if they did not  
15 complete DTI scanning sessions.

16 **Matched groups.** Two groups of participants were selected from the full HCP dataset  
17 with complete DTI data, utilizing the case-control matching function in SPSS (v.24).  
18 Demographic information for final groups ( $N = 218$ ; 41.3% female) can be found in  
19 Supplemental Table 1. Group indicator was defined as self-reported history of chemical  
20 dependency in at least one parent. Groups were matched one-to-one on sex, age in years, and  
21 diagnostic history of alcohol abuse or dependence (per the Semi-Structured Assessment for the  
22 Genetics of Alcoholism). Current alcohol usage (i.e., past 7 days) was defined categorically as  
23 “abstinent” (0 drinks), “moderate” (1 – 20 drinks), and “heavy” drinkers ( $\geq 21$  drinks) consistent

## WHITE MATTER CONNECTOMETRY

1 with previous literature (Makris *et al.* 2008). Education was also defined categorically (11-12  
2 years, 13-15 years, and  $\geq 16$  years of education). Participants were then matched exactly on  
3 current alcohol usage and education categories. Of note, although groups were not matched for  
4 income or other substance usage, pre-analyses revealed no significant group differences on  
5 income, illicit drug lifetime usage, current tobacco use, current cannabis use, history of cannabis  
6 abuse or dependence. The final groups had an average age of 28.90 ( $SD = 3.67$ ), approximately  
7 14 years of education, and 13.8% had a lifetime history of an alcohol use disorder.

### 8 **Diffusion Tensor Imaging**

9 **Image acquisition and preprocessing.** DTI scans were acquired on a Siemens 3T Skyra  
10 system, with a SC72 gradient coil and simultaneous multi-slice echo planar imaging with  
11 multiband excitation and multiple receivers at 1.25 mm spatial resolution. DTI scans were pre-  
12 processed using the HCP diffusion pipeline, which includes several tools to remove motion and  
13 scanner related noise. All images were processed in FSL's BEDPOSTX (Bayesian Estimation of  
14 Diffusion Parameters Obtained using Sampling Techniques, modeling crossing X fibers) to  
15 model white matter fiber orientations and crossing fibers for probabilistic tractography. Details  
16 on image acquisition, pre-processing, and data quality can be found in previously published  
17 literature (Sotiropoulos *et al.* 2013).

18 **Reconstruction and group connectometry analysis.** Group connectometry analyses  
19 (Yeh *et al.* 2016) were performed using DSI-Studio (<http://dsi-studio.labsolver.org>) to study the  
20 effect of family history. Diffusion data was reconstructed in MNI space using q-space  
21 diffeomorphic reconstruction (QSDR) (Yeh *et al.* 2010, 2011) to obtain the spin distribution  
22 function (SDF) with a sampling length ratio of 1.25. A multiple regression model was used to  
23 consider family history for all 218 subjects, controlling for age and sex. A T-score threshold of



## WHITE MATTER CONNECTOMETRY

1 3.65 (corresponding to a medium effect size,  $d \geq 0.50$ ) was assigned to select local connectomes  
2 using a deterministic fiber tracking algorithm (Yeh *et al.* 2016). A false discovery rate (FDR)  
3 threshold of 0.05 was used to select tracks showing significant differences between groups, with  
4 1 seed per  $0.15 \text{ mm}^3$ , and two iterations of track trimming. Given previous literature showing the  
5 lower bound for major tracts (Hasan *et al.* 2009), subsequent analyses were also completed with  
6 track inclusion of at least  $>40 \text{ mm}$  to determine if differences were in major tracts. To estimate  
7 the false discovery rate, a total of 5000 randomized permutations were used to obtain the null  
8 distribution of tract length. The length is calculated by adding the distance between *consecutive*  
9 coordinates along a tract. Network analysis of selected tracks was generated with DSI Studio  
10 after permutation analysis. Of note, differences from group connectometry analyses identify  
11 continuous segments with significant differences in SDF at peak orientation, regardless of  
12 whether those segments make up an entire tract. This is in contrast to traditional fiber tracking,  
13 which identifies differences in averages across the entire length of a tract.

### 14 **Tract-Behavior Relationships**

15 **Cognitive Tasks.** As part of the behavioral data research protocol, participants completed  
16 cognitive tasks included in the NIH Toolbox (<http://www.nihtoolbox.org/>). Current analyses  
17 included data from the following cognitive tasks expected to be related to alcohol and substance  
18 use vulnerability: Delayed Discounting, Dimensional Change Card Sort, Flanker Inhibitory  
19 Control and Attention Task, and Oral Reading Recognition as a comparison task. These  
20 cognitive tasks measure domains of reward processing/impulsivity, cognitive  
21 flexibility/monitoring, inhibition, and language/reading decoding. Further details about these  
22 cognitive tasks has been provided in previous literature (Weintraub *et al.* 2013; Van Essen *et al.*  
23 2013).

## WHITE MATTER CONNECTOMETRY

1           **Measures of White Matter Microstructure.** The following measures of white matter  
2 microstructure of selected tracts were extracted for further analysis (Hypothesis 2): normalized  
3 quantitative anisotropy (NQA; normalized to the maximum QA in the brain for between-subject  
4 comparisons, where QA is the SDF of the resolved fiber orientation minus the background  
5 isotropic component), generalized fractional anisotropy (GFA), and isotropic diffusion  
6 component (ISO). Tracts were identified using the HCP-842 Atlas available in DSI-Studio for  
7 QSDR reconstructed tracts. Extracted values represent the mean and standard deviation along the  
8 *entire tract length* of a single subject. Both mean and standard deviation were extracted for  
9 analyses because SDF metrics have high variability between- and within-subjects, and variability  
10 within structures may show meaningful differences as it does in grey matter brain structures  
11 (Wierenga *et al.* 2018). Regarding interpretation, NQA is a density measurement of anisotropy,  
12 and thus related to the compactness, or restriction of spins, within fibers along the continuous  
13 length of a tract and axonal density. Scaled 0 to 1, values closer to 1 represent more compact  
14 fibers. In contrast, while ISO is another density measurement, it characterizes background  
15 diffusion, and is thus more related to global diffusion factors such as vasogenic tissue edema  
16 (Chiang *et al.* 2014). These were estimated by taking the minimum value of the SDF. Finally,  
17 GFA is highly correlated with traditional fractional anisotropy. It describes the preferential  
18 directional diffusion mobility, and is a refinement of the traditional approach, but accommodates  
19 more complex diffusion information (Glenn *et al.* 2015).

20           **Statistical Analyses.** Partial correlation matrices, controlling for age and sex, were  
21 generated between cognitive tasks and measures of white matter microstructure in tracts that  
22 were identified as having *significant group differences*. Correlation matrices for each group  
23 (FH+ and FH-) were then compared using a Fisher's r-to-z-transformation to determine if the

## WHITE MATTER CONNECTOMETRY

1 relationship between tract characteristics and behavior was moderated by family history of  
2 chemical dependency. To further determine whether the relationship between white matter and  
3 behavioral measures varied by group, we utilized a general linear model with non-parametric  
4 permutation testing (5000 permutations) via FSL's PALM to account for family structure in the  
5 HCP data. Interactions were tested with a two-group regression model with continuous covariate  
6 interaction, adjusted for main effects, sex, multiple tract comparisons, and family structure ( $p <$   
7  $.05$ ).

8  
9

### Results

#### 10 Effects of Family History

11 **Family History.** In regression models controlling for sex and current drinking, there  
12 were significant main effects for family history on the local connectome. Using an FDR cut-off,  
13 the FH+ group ( $N = 109$ ) had significantly lowered connectivity compared to the FH- group ( $N =$   
14  $109$ ), in 1092 segments of bilateral cerebellum, bilateral u fibers, bilateral cortico-striatal, left  
15 cortico-thalamic, left inferior longitudinal fasciculus and the corpus callosum ( $FDR < 0.05$ ; See  
16 Supplemental Figure 1). Restricting tract selection to major tracts ( $> 40\text{mm}$ ), analyses revealed  
17 that the FH+ had significantly lowered connectivity in 97 segments ( $M = 46.69$  mm,  $SD = 6.06$   
18 mm) of left inferior longitudinal fasciculus, bilateral cortico-striatal pathway, left cortico-  
19 thalamic pathway, and corpus callosum ( $FDR < 0.05$ ; See Figure 1). Fibers in the corpus  
20 callosum were localized to interhemispheric, posterior cingulate regions. For these major tracts,  
21 network property analyses revealed that these group differences accounted for a 16.1% decrease  
22 in overall density, a 13.1% decrease in the clustering coefficient, and 11.6% decrease in small  
23 worldedness, and a 13.9% decrease in local efficiency for the FH+ group. It is important to note  
24 that the bilateral U fibers, or short association fibers which connect adjacent brain regions, would

## WHITE MATTER CONNECTOMETRY

1 not be expected to reach sufficient lengths to be characterized as “major tracts”. There is  
2 significant variability within these tracts, and while visualization revealed differences in  
3 continuous segments between cortical, cerebellar, and striatal regions implicated in reward  
4 signaling, the average quantitative anisotropy across the entire length of tracts were nearly  
5 identical between groups.

6 **Sex Effects.** Post-hoc analyses were performed to determine if the two sexes were  
7 differentially affected by family history. There were no interactions between family history and  
8 sex in group connectometry analyses, using either FDR or tract length thresholds. For all  
9 subsequent analyses of tract-behavior relationships, sex was controlled for in addition to age as a  
10 covariate of non-interest.

### 11 **Tract-Behavior Relationships**

12 Between groups, there were no significant differences in performance on cognitive  
13 measures, or on measures of NQA, GFA, or ISO within specific identified tracts (See  
14 Supplemental Table 2). In contrast to local connectome analyses, NQA, GFA, and ISO values  
15 represent the average value along the *full* length of the tract. However, for some tasks, tracts, and  
16 measures there was a significant *interaction*, where the association between brain and behavior  
17 differed between groups.

18 Generally, when the relationship between brain and behavior significantly differed  
19 between groups, the association was stronger in FH+ compared to FH-, although there was some  
20 variability by task and measure. For the reward processing task (i.e., Delayed Discounting),  
21 performance was positively associated with GFA and ISO measures, negatively with NQA  
22 measures, and generally stronger in the FH+ group. For the inhibition task (i.e., Flanker),  
23 measures of GFA and NQA were weakly, positively associated with performance in the FH-

## WHITE MATTER CONNECTOMETRY

1 group, and weakly, negatively associated with performance in the FH+ group. However, the  
2 reverse was true for the measures of ISO. A similar pattern emerged for monitoring task (i.e.,  
3 Card Sort), with the exception of mean GFA, which was weakly negatively associated with  
4 performance in the FH- group. As expected, the relationship between tracts and our comparison  
5 task (i.e., Reading) did not significantly vary between groups on any measure after permutations  
6 and correction for multiple comparisons. Reading was positively associated with measures of  
7 GFA and ISO and negatively with measures of NQA. While the differences in interaction effects  
8 size between the comparison task and tasks of interest were largely non-significant (i.e.,  
9 overlapping confidence intervals), the consistency in results for the comparison task is notable.

10 Results for tract specific findings are described separately for NQA and GFA measures  
11 and the three behavioral tasks of interest (i.e., reward processing, monitoring, inhibition). Tract  
12 specific findings for ISO are presented in Supplement 1. A summary of the interaction findings is  
13 shown in Table 1 and representative scatter plots are shown in Figure 2 to demonstrate the  
14 patterns of effects. Partial correlation matrices separated by group for mean and standard  
15 deviation of NQA, GFA, and ISO along the full length of white matter microstructure are  
16 available in Supplemental Tables 3-8.

17 **NQA.** Mean NQA was significantly negatively associated with reward processing in  
18 bilateral cortico-striatal pathways, left cortico-thalamic pathways, left u-fibers, and the corpus  
19 callosum, and with reading in the right cortico-thalamic and cortico-striatal pathways, for FH+  
20 individuals only. However, there was no significant interaction, suggesting that the brain-  
21 behavior relationship did not differ between groups. The interaction analyses did reveal that the  
22 relationship between inhibition and bilateral inferior longitudinal fasciculi, left u-fibers, left

## WHITE MATTER CONNECTOMETRY

1 cortico-thalamic pathway, and the left cortico-striatal pathway differed between groups, with  
2 weak negative correlations in the FH+ group and weak positive correlations in the FH- group.

3 NQA variability was also significantly negatively associated with reward processing and  
4 reading in the corpus callosum, left cortico-thalamic, and –striatal pathways for FH+. Again,  
5 these findings were not found to be significant within the interaction analyses. For both the  
6 inhibition and cognitive flexibility/monitoring tasks, the brain-behavior relationship significantly  
7 varied between groups, with similar patterns of directional flipping as in the mean NQA findings.  
8 NQA variability associations with inhibition differed in the left inferior longitudinal fasciculus,  
9 u-fibers, cortico-thalamic pathways, corpus callosum, and bilateral cortico-striatal pathways  
10 while the association with monitoring only differed in the left cortico-striatal, and cortico–  
11 thalamic pathways.

### 12 **GFA.**

13 Generally, the average GFA of identified tracts was not associated with performance on  
14 reward processing tasks in either group. In contrast, variability of GFA within identified tracts  
15 was positively associated with tasks of reward processing for the FH+ group only. However,  
16 after testing the interaction in PALM only GFA variability in left cerebellum, right inferior  
17 longitudinal fasciculus, and right u-fibers was more significantly related to reward processing in  
18 the FH+ group.

19 For cognitive flexibility/monitoring, performance was not significantly related to GFA  
20 averages or variability in almost every tract. However, when examining the interaction, the  
21 relationship between brain and behavior significantly differed between groups for variability in  
22 bilateral cortico-thalamic pathway, cortico-striatal pathways, and left u-fibers. Association with

## WHITE MATTER CONNECTOMETRY

1 average GFA differed between groups for the inhibition task only, in the left cortico-striatal  
2 pathway, left cortico-thalamic pathways, and right inferior longitudinal fasciculus.

### 3 **Discussion**

4 The principal findings of this study are that (1) family history of drug and alcohol  
5 dependence was associated with decreased white matter connectivity along ventral and  
6 subcortical tracts in adulthood, including (2) major tracts in the left cortico-thalamic, bilateral  
7 cortico-striatal, left inferior longitudinal fasciculus and corpus callosum. Additionally, (3) while  
8 across the entire length of the tracts, average density based measurements were nearly identical,  
9 (4) the relationship between white matter microstructure and clinically relevant behavior was  
10 significantly different between groups. These results are impactful for a number of reasons.

11 This is the first study to leverage the advantages of density based white matter  
12 measurements to examine structural vulnerabilities conferred by a family history of chemical  
13 dependency. All significant identified segments of major tracts were found within the ventral and  
14 subcortical pathways associated with reward and inhibitory processing. Specifically, these tracts  
15 connect regions associated with cue reactivity in frequent drinkers (Fryer *et al.* 2013) and  
16 projections may be associated with saccade reward signals and saliency given the involvement of  
17 the posterior cingulate cortex in those functions (McCoy *et al.* 2003; Vossel *et al.* 2014). These  
18 results are also consistent with previous dMRI studies in individuals with severe alcohol misuse  
19 symptomatology (Seitz *et al.* 2017; Sawyer *et al.* 2018). The major tract identification finding of  
20 the interhemispheric connections are consistent with *functional findings* in adolescents (Herting  
21 *et al.* 2011), of dysregulation in contra-lateral cortico-subcortical projections. While the findings  
22 in that study identified corresponding decreases in fractional anisotropy in the superior  
23 longitudinal fasciculus and internal capsule, they did not identify interhemispheric tracts that

## WHITE MATTER CONNECTOMETRY

1 may impact contralateral connectivity. This may have resulted from the increased proportion of  
2 crossing fibers in the corpus callosum. The novel identification of u-fibers as an area of  
3 vulnerability for this population may result from their relative “sparing” or delayed involvement  
4 in pathological processes, due to their resistance to myelin metabolic effects. U-fibers are often  
5 impacted when oligodendroglia cell bodies are directly affected, as opposed to myelin metabolic  
6 turnover (Welker & Patton 2012; Riley *et al.* 2018), and these cell body changes may not have  
7 yet impacted the integrity of expressed myelin. A density based measure, which more accurately  
8 represents the axonal integrity, is therefore more sensitive to the effects of u-fibers particularly in  
9 subclinical populations.

10 Our findings are in young adults, where we would expect white matter to be more fully  
11 developed relative to previous studies of adolescents. This supports the conclusion that  
12 vulnerabilities conferred by a family history of chemical dependency persist into adulthood, and  
13 do not simply represent a slowed trajectory of white matter development. While it is possible that  
14 slowed development contributed to riskier behaviors in adolescence, and subsequent damage to  
15 white matter persisting into adulthood, our stringent matching criteria between groups make this  
16 explanation less likely. The age of our sample may also contribute to the increased interaction  
17 findings in the left hemisphere for the cognitive flexibility/monitoring task, which is consistent  
18 with theories of compensatory mechanisms and lowered bilateral recruitment needs in early  
19 adulthood (Reuter-Lorenz & Cappell 2008). Through early and middle adulthood, these  
20 vulnerabilities may compound with increasing environmental stress and recruitment needs, and  
21 examinations of familial risk should consider the role of these biological differences throughout  
22 the entire lifespan developmental trajectory. Similarly, while we did not find interactive sex  
23 differences in this sample, a lifespan approach may be impacted by hormonal differences in the



## WHITE MATTER CONNECTOMETRY

1 latter half of the lifespan and interact with drinking behavior (Seitz *et al.* 2017; Sawyer *et al.*  
2 2018). However, to fully understand these lifespan trajectories, longitudinal research is needed in  
3 the population which extend from adolescence into early and middle adulthood.

4 Our findings suggest that the relationship between brain and behavior differed  
5 significantly between groups. While many of the relationships between white matter and  
6 inhibitory or monitoring processes were non-significant, there were a number of significant  
7 interactive effects across NQA, GFA, and ISO. In particular, the number of interaction effects  
8 found for the monitoring and inhibition tasks imply that systems involved in attending to  
9 reinforcement and error monitoring may be especially vulnerable. The patterns of findings were  
10 also similar for these two tasks regarding strength and direction, perhaps due to the involvement  
11 of error monitoring across both. Given the relative health of this population, and the lack of  
12 group differences on behavioral tasks or tract quality, we believe these interactive effects reveal  
13 underlying vulnerabilities that could emerge over time. The consistency of the comparison task  
14 across groups support our conclusion that these vulnerabilities differentially affect cognitive  
15 skills in reward and inhibitory processes. Family history of chemical dependency does not confer  
16 global abnormalities, but rather specific dysregulation that contribute to the future risk of alcohol  
17 and substance misuse. This makes it more likely that these differences result from the genetic  
18 contributions of family history, and not associated social factors that affect more global  
19 measures, and which may be more prevalent among parents with alcohol and substance use  
20 problems.

21 The discrepancy in correlational direction in the NQA and GFA findings is notable. As  
22 expected, increased mean GFA was generally positively associated with reward processing  
23 performance across both groups, which is consistent with findings in traditional diffusion

## WHITE MATTER CONNECTOMETRY

1 measures (Samanez-Larkin *et al.* 2012). This relationship was reversed for mean NQA in the  
2 FH+ group, suggesting as fiber density approaches maximum values, performance on tasks of  
3 reward processing becomes worse. This relationship may reflect a dysregulation in *axonal body*  
4 pruning, which is supported by findings which show that increased variability in NQA (i.e.,  
5 uneven or unreliable pruning) is also associated with worse performance. Comparatively,  
6 variability in GFA was associated with better performance and may be more reflective of the  
7 *myelin* integrity that is constantly remodeling within healthy adults in ways that axon bodies  
8 cannot (Young *et al.* 2013). However, because larger ISO values (or minimum SDF) were  
9 associated with better performance in the FH+ group, the impact of pruning on performance may  
10 follow a Yerkes–Dodson distribution. As with findings on risk taking behaviors and increased  
11 fractional anisotropy (Berns *et al.* 2009; Squeglia *et al.* 2014), these differences may also be  
12 associated with maladaptive behaviors outside the scope of neuropsychological testing measures.  
13 Notably, density based measures also displayed lateralized trends within analyses for behavioral  
14 relevance, where NQA association with behavior largely differed between groups in the left  
15 hemispheric major tracts, while ISO associations differed largely in the right hemisphere. This  
16 suggests there may also be differential effects of family history on hemispheres in early  
17 adulthood. More research is needed to further explore these dissociations.

18       There are several important limitations in this study which present the potential for future  
19 investigations. Our goal was to examine the effects on white matter when at a more  
20 developmentally advanced stage compared to earlier research, but we recognize that there is  
21 individual variation for neural developmental trajectories. Further, our focus on early adulthood  
22 has limited the impact of our findings from a lifespan perspective. Future investigations would  
23 benefit from examining the impact of family history on density-based measurements across the

## WHITE MATTER CONNECTOMETRY

1 full lifespan to better characterize the trajectory and risk associated with these vulnerabilities.  
2 These findings largely describe biological characteristics that have not yet resulted in observable  
3 behavioral outcomes, and are therefore limited in their clinical relevance at the present time.  
4 However, we believe that future investigations of the interaction between family history and  
5 substance use may reveal more clinically useful information regarding critical time points of  
6 intervention.

7 In summary, to our knowledge this is the first study examining the effect of family  
8 history of alcohol and substance use utilizing a group connectometry analysis. Density based  
9 measurements were more sensitive to axonal body differences in white matter, particularly in  
10 areas where fibers cross. Our findings suggest that these vulnerabilities may exist in early  
11 adulthood, are likely the end result of maturational differences identified in previous studies of  
12 adolescent samples, and are specific to reward and inhibitory processes. Further investigation  
13 utilizing density based measures will increase our understanding of the mechanisms by which  
14 family history affects neural characteristics will help to identify treatment targets and critical  
15 periods of intervention.

16

## WHITE MATTER CONNECTOMETRY

### 1 **Acknowledgments**

2 The authors would like to acknowledge the following people and organizations for their  
3 contributions:

4 Data were provided [in part] by the Human Connectome Project, WU-Minn Consortium  
5 (Principal Investigators: David Van Essen and Kamil Ugurbil; 1U54MH091657) funded by the  
6 16 NIH Institutes and Centers that support the NIH Blueprint for Neuroscience Research; and by  
7 the McDonnell Center for Systems Neuroscience at Washington University.

8 The Suffolk University Psychology Department for their support of doctoral students and David  
9 Gansler's Lab.

### 10 **Conflict of Interest**

11 Conflicts of interest Abigail B. Waters, Kayle S. Sawyer, and David A. Gansler declare that they  
12 have no conflicting interests. This research did not receive any specific grant from funding  
13 agencies in the public, commercial, or not-for-profit sectors. Informed consent All procedures  
14 followed were in accordance with the ethical standards of the responsible committee on human  
15 experimentation (institutional and national) and with the Helsinki Declaration of 1975, and the  
16 applicable revisions at the time of the investigation. Informed consent was obtained from all  
17 patients for being included in the study. The content is solely the responsibility of the authors  
18 and does not necessarily represent the official views of the National Institutes of Health, the U.S.  
19 Department of Veterans Affairs, or the United States Government

## WHITE MATTER CONNECTOMETRY

### References

- 1
- 2 Acheson A, Wijtenburg SA, Rowland LM, Winkler A, Gaston F, Mathias CW, Fox PT, Lovallo  
3 WR, Wright SN, Hong E, Dougherty DM & Kochunov P (2014) Assessment of whole  
4 brain white matter integrity in youths and young adults with a family history of substance  
5 use disorders. *Hum Brain Mapp* 35:5401–5413.
- 6 Agrawal A & Lynskey MT (2008) Are there genetic influences on addiction: evidence from  
7 family, adoption and twin studies. *Addiction* 103:1069–1081.
- 8 Bava S & Tapert SF (2010) Adolescent Brain Development and the Risk for Alcohol and Other  
9 Drug Problems. *Neuropsychol Rev* 20:398–413.
- 10 Berns GS, Moore S & Capra CM (2009) Adolescent Engagement in Dangerous Behaviors Is  
11 Associated with Increased White Matter Maturity of Frontal Cortex. *PLOS ONE* 4:e6773.
- 12 Chiang C-W, Wang Y, Sun P, Lin T-H, Trinkaus K, Cross AH & Song S-K (2014) Quantifying  
13 white matter tract diffusion parameters in the presence of increased extra-fiber cellularity  
14 and vasogenic edema. *NeuroImage* 101:310–319.
- 15 Corral M, Holguín SR & Cadaveira F (2003) Neuropsychological characteristics of young  
16 children from high-density alcoholism families: a three-year follow-up. *J Stud Alcohol*  
17 64:195–199.
- 18 Fryer SL, Jorgensen KW, Yetter EJ, Daurignac EC, Watson TD, Shanbhag H, Krystal JH &  
19 Mathalon DH (2013) Differential Brain Response to Alcohol Cue Distractors across  
20 Stages of Alcohol Dependence. *Biol Psychol* 92:282–291.
- 21 Glenn GR, Helpert JA, Tabesh A & Jensen JH (2015) Quantitative assessment of diffusional  
22 kurtosis anisotropy: KURTOSIS ANISOTROPY. *NMR Biomed* 28:448–459.

## WHITE MATTER CONNECTOMETRY

- 1 Hagmann P, Cammoun L, Gigandet X, Gerhard S, Ellen Grant P, Wedeen V, Meuli R, Thiran J-  
2 P, Honey CJ & Sporns O (2010) MR connectomics: Principles and challenges. *J*  
3 *Neurosci Methods* 194:34–45.
- 4 Hasan KM, Iftikhar A, Kamali A, Kramer LA, Ashtari M, Cirino PT, Papanicolaou AC, Fletcher  
5 JM & Ewing-Cobbs L (2009) Development and aging of the healthy human brain  
6 uncinata fasciculus across the lifespan using diffusion tensor tractography. *Brain Res*  
7 1276:67–76.
- 8 Herting MM, Fair D & Nagel BJ (2011) Altered fronto-cerebellar connectivity in alcohol-naïve  
9 youth with a family history of alcoholism. *NeuroImage* 54:2582–2589.
- 10 Herting MM, Schwartz D, Mitchell SH & Nagel BJ (2010) Delay discounting behavior and  
11 white matter microstructure abnormalities in youth with a family history of alcoholism.  
12 *Alcohol Clin Exp Res* 34:1590–1602.
- 13 Makris N, Oscar-Berman M, Jaffin SK, Hodge SM, Kennedy DN, Caviness VS, Marinkovic K,  
14 Breiter HC, Gasic GP & Harris GJ (2008) Decreased Volume of the Brain Reward  
15 System in Alcoholism. *Biol Psychiatry* 64:192–202.
- 16 McCoy AN, Crowley JC, Haghigian G, Dean HL & Platt ML (2003) Saccade reward signals in  
17 posterior cingulate cortex. *Neuron* 40:1031–1040.
- 18 Merikangas KR & McClair VL (2012) Epidemiology of Substance Use Disorders. *Hum Genet*  
19 131:779–789.
- 20 Moss HB, Chen CM & Yi HY (2007) Subtypes of alcohol dependence in a nationally  
21 representative sample. *Drug Alcohol Depend* 91:149–158.

## WHITE MATTER CONNECTOMETRY

- 1 Reuter-Lorenz PA & Cappell KA (2008) Neurocognitive Aging and the Compensation  
2 Hypothesis, Neurocognitive Aging and the Compensation Hypothesis. *Curr Dir Psychol*  
3 *Sci* 17:177–182.
- 4 Riley KJ, O’Neill DP & Kralik SF (2018) Subcortical U-Fibers: Signposts to the Diagnosis of  
5 White Matter Disease. *Neurographics* 8:234–243.
- 6 Rolls ET (2000) The Orbitofrontal Cortex and Reward. *Cereb Cortex* 10:284–294.
- 7 Samanez-Larkin GR, Levens SM, Perry LM, Dougherty RF & Knutson B (2012) Frontostriatal  
8 White Matter Integrity Mediates Adult Age Differences in Probabilistic Reward  
9 Learning. *J Neurosci* 32:5333–5337.
- 10 Sawyer KS, Maleki N, Papadimitriou G, Makris N, Oscar-Berman M & Harris GJ (2018)  
11 Cerebral white matter sex dimorphism in alcoholism: a diffusion tensor imaging study.  
12 *Neuropsychopharmacol Off Publ Am Coll Neuropsychopharmacol* 43:1876–1883.
- 13 Seitz J, Sawyer KS, Papadimitriou G, Oscar-Berman M, Ng I, Kubicki A, Mouradian P, Ruiz  
14 SM, Kubicki M, Harris GJ & Makris N (2017) Alcoholism and sexual dimorphism in the  
15 middle longitudinal fascicle: a pilot study. *Brain Imaging Behav* 11:1006–1017.
- 16 Soares J, Marques P, Alves V & Sousa N (2013) A hitchhiker’s guide to diffusion tensor  
17 imaging. *Front Neurosci* 7.
- 18 Sotiropoulos SN, Jbabdi S, Xu J, Andersson JL, Moeller S, Auerbach EJ, Glasser MF,  
19 Hernandez M, Sapiro G, Jenkinson M, Feinberg DA, Yacoub E, Lenglet C, Van Essen  
20 DC, Ugurbil K & Behrens TEJ (2013) Advances in diffusion MRI acquisition and  
21 processing in the Human Connectome Project. *NeuroImage* 80:125–143.

## WHITE MATTER CONNECTOMETRY

- 1 Squeglia LM, Jacobus J, Brumback T, Meloy MJ & Tapert SF (2014) White matter integrity in  
2 alcohol-naive youth with a family history of alcohol use disorders. *Psychol Med*  
3 44:2775–2786.
- 4 Van Essen DC, Smith SM, Barch DM, Behrens TEJ, Yacoub E & Ugurbil K (2013) The WU-  
5 Minn Human Connectome Project: An Overview. *NeuroImage* 80:62–79.
- 6 Vossel S, Geng JJ & Fink GR (2014) Dorsal and ventral attention systems: distinct neural  
7 circuits but collaborative roles. *Neurosci Rev J Bringing Neurobiol Neurol Psychiatry*  
8 20:150–159.
- 9 Walters GD (2002) The Heritability of Alcohol Abuse and Dependence: A Meta-Analysis of  
10 Behavior Genetic Research. *Am J Drug Alcohol Abuse* 28:557–584.
- 11 Weintraub S, Dikmen SS, Heaton RK, Tulsky DS, Zelazo PD, Bauer PJ, Carlozzi NE, Slotkin J,  
12 Blitz D, Wallner-Allen K, Fox NA, Beaumont JL, Mungas D, Nowinski CJ, Richler J,  
13 Deocampo JA, Anderson JE, Manly JJ, Borosh B, Havlik R, Conway K, Edwards E,  
14 Freund L, King JW, Moy C, Witt E & Gershon RC (2013) Cognition assessment using  
15 the NIH Toolbox. *Neurology* 80:S54–S64.
- 16 Welker KM & Patton A (2012) Assessment of normal myelination with magnetic resonance  
17 imaging. *Semin Neurol* 32:15–28.
- 18 Whiteford HA, Degenhardt L, Rehm J, Baxter AJ, Ferrari AJ, Erskine HE, Charlson FJ, Norman  
19 RE, Flaxman AD, Johns N, Burstein R, Murray CJL & Vos T (2013) Global burden of  
20 disease attributable to mental and substance use disorders: findings from the Global  
21 Burden of Disease Study 2010. *The Lancet* 382:1575–1586.
- 22 Wierenga LM, Sexton JA, Laake P, Giedd JN, Tamnes CK & Pediatric Imaging,  
23 Neurocognition, and Genetics Study (2018) A Key Characteristic of Sex Differences in



## WHITE MATTER CONNECTOMETRY

- 1           the Developing Brain: Greater Variability in Brain Structure of Boys than Girls. *Cereb*  
2           *Cortex N Y N 1991* 28:2741–2751.
- 3   Yeh F-C, Badre D & Verstynen T (2016) Connectometry: A statistical approach harnessing the  
4           analytical potential of the local connectome. *NeuroImage* 125:162–171.
- 5   Yeh F-C, Verstynen TD, Wang Y, Fernández-Miranda JC & Tseng W-YI (2014) Correction:  
6           Deterministic Diffusion Fiber Tracking Improved by Quantitative Anisotropy. *PLOS*  
7           *ONE* 9:10.1371/annotation/0f3b12de-8b8b-4dda-9ff4-835b8631e1dc.
- 8   Yeh F-C, Wedeen VJ & Tseng W-YI (2011) Estimation of fiber orientation and spin density  
9           distribution by diffusion deconvolution. *NeuroImage* 55:1054–1062.
- 10   Yeh F-C, Wedeen VJ & Tseng W-YI (2010) Generalized q-sampling imaging. *IEEE Trans Med*  
11           *Imaging* 29:1626–1635.
- 12   Young KM, Psachoulia K, Tripathi RB, Dunn S-J, Cossell L, Attwell D, Tohyama K &  
13           Richardson WD (2013) Oligodendrocyte Dynamics in the Healthy Adult CNS: Evidence  
14           for Myelin Remodeling. *Neuron* 77:873–885.
- 15   Zhang H, Wang Y, Lu T, Qiu B, Tang Y, Ou S, Tie X, Sun C, Xu K & Wang Y (2013)  
16           Differences between generalized q-sampling imaging and diffusion tensor imaging in the  
17           preoperative visualization of the nerve fiber tracts within peritumoral edema in brain.  
18           *Neurosurgery* 73:1044–1053; discussion 1053.
- 19  
20

## WHITE MATTER CONNECTOMETRY

1 *Table 1.* Summary of interaction effects between measures of white matter connectivity (mean  
 2 and standard deviation in NQA, GFA, and ISO). Significant findings are separated by task, and  
 3 hemisphere of finding is denoted with L and/or R (X for the corpus callosum). All findings  $p <$   
 4  $0.05$  after correcting for tract comparisons. DCCS: Dimension Change Card Sort, DD: Delayed  
 5 Discounting.

|                                         | DCCS     |           | Flanker  |           | DD       |           |
|-----------------------------------------|----------|-----------|----------|-----------|----------|-----------|
|                                         | <i>M</i> | <i>SD</i> | <i>M</i> | <i>SD</i> | <i>M</i> | <i>SD</i> |
| <b>NQA</b>                              |          |           |          |           |          |           |
| <i>Corpus Callosum</i>                  |          |           |          | X         |          |           |
| <i>Cortico-striatal</i>                 |          | L         | L        | L/R       |          |           |
| <i>Cortico-thalamic</i>                 |          | L         | L        | L         |          |           |
| <i>Cerebellum</i>                       |          |           |          |           |          |           |
| <i>Inferior Longitudinal Fasciculus</i> |          |           | L/R      | L         |          |           |
| <i>U Fibers</i>                         |          |           | L        | L         |          |           |
| <b>GFA</b>                              |          |           |          |           |          |           |
| <i>Corpus Callosum</i>                  |          |           |          |           |          |           |
| <i>Cortico-striatal</i>                 |          | L/R       | L        |           |          |           |
| <i>Cortico-thalamic</i>                 |          | L/R       | L        |           |          |           |
| <i>Cerebellum</i>                       |          |           |          |           |          |           |
| <i>Inferior Longitudinal Fasciculus</i> |          |           | R        |           |          | R         |
| <i>U Fibers</i>                         |          | L         |          |           |          | R         |
| <b>ISO</b>                              |          |           |          |           |          |           |
| <i>Corpus Callosum</i>                  |          |           | X        |           |          | X         |
| <i>Cortico-striatal</i>                 |          |           | R        |           |          |           |
| <i>Cortico-thalamic</i>                 |          |           | R        | R         |          | R         |
| <i>Cerebellum</i>                       |          |           |          |           |          |           |
| <i>Inferior Longitudinal Fasciculus</i> |          |           |          |           |          | R         |
| <i>U Fibers</i>                         |          | R         | R        | R         |          |           |

6

7

## WHITE MATTER CONNECTOMETRY

### 1 **Figure Legends**

2 **Figure 1.** Major tract findings, where the FH+ group had significantly lowered connectivity in  
3 segments of at least 40mm or greater, compared to the FH- group.

4 **Figure 2.** Representative scatter plots of the brain, behavior, group interaction. The following  
5 tasks are shown on the y-axis: Flanker (Standard Score), Delayed Discounting (Area under the  
6 curve), and Reading (Standard Score). The cortico-thalamic pathway is represented on the x-axis  
7 for measures of within tract GFA (A) and NQA (B) *variability*. Dimensional Card Sort is not  
8 shown, as the patterns of findings were similar to the Flanker.

9 **Supplemental Figure 2.** All tract findings ( $FDR < 0.05$ ) for decreased connectivity in the FH+  
10 group compared to FH- group.

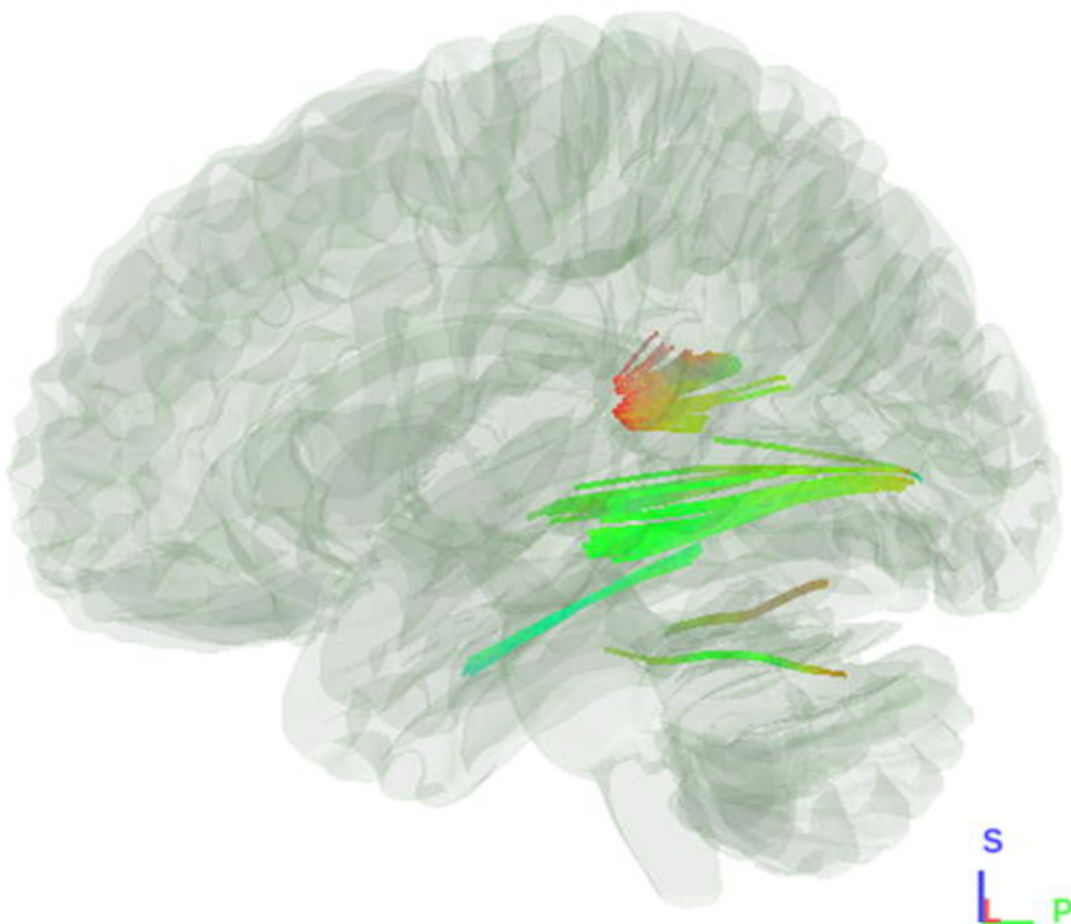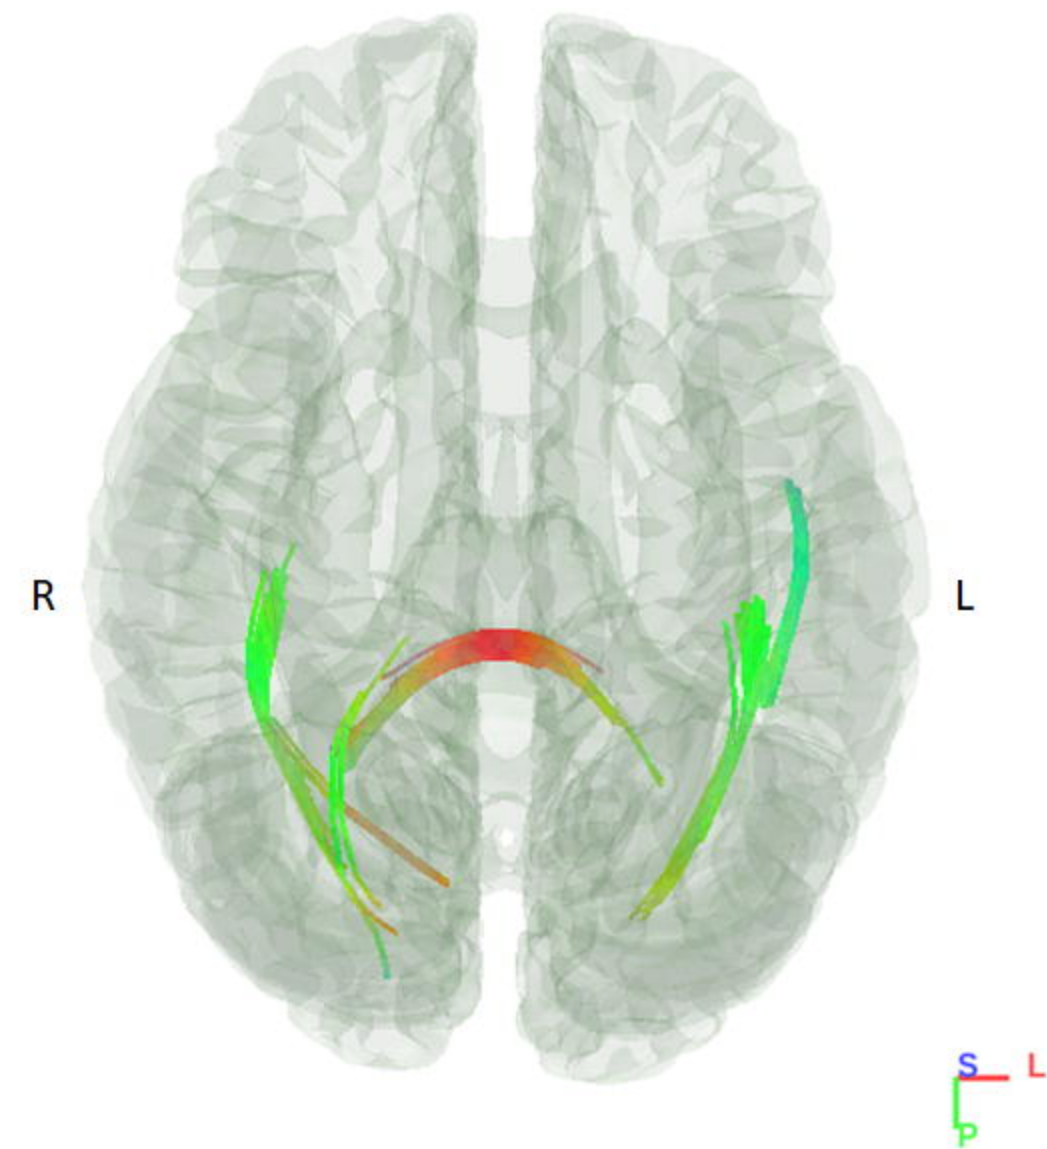

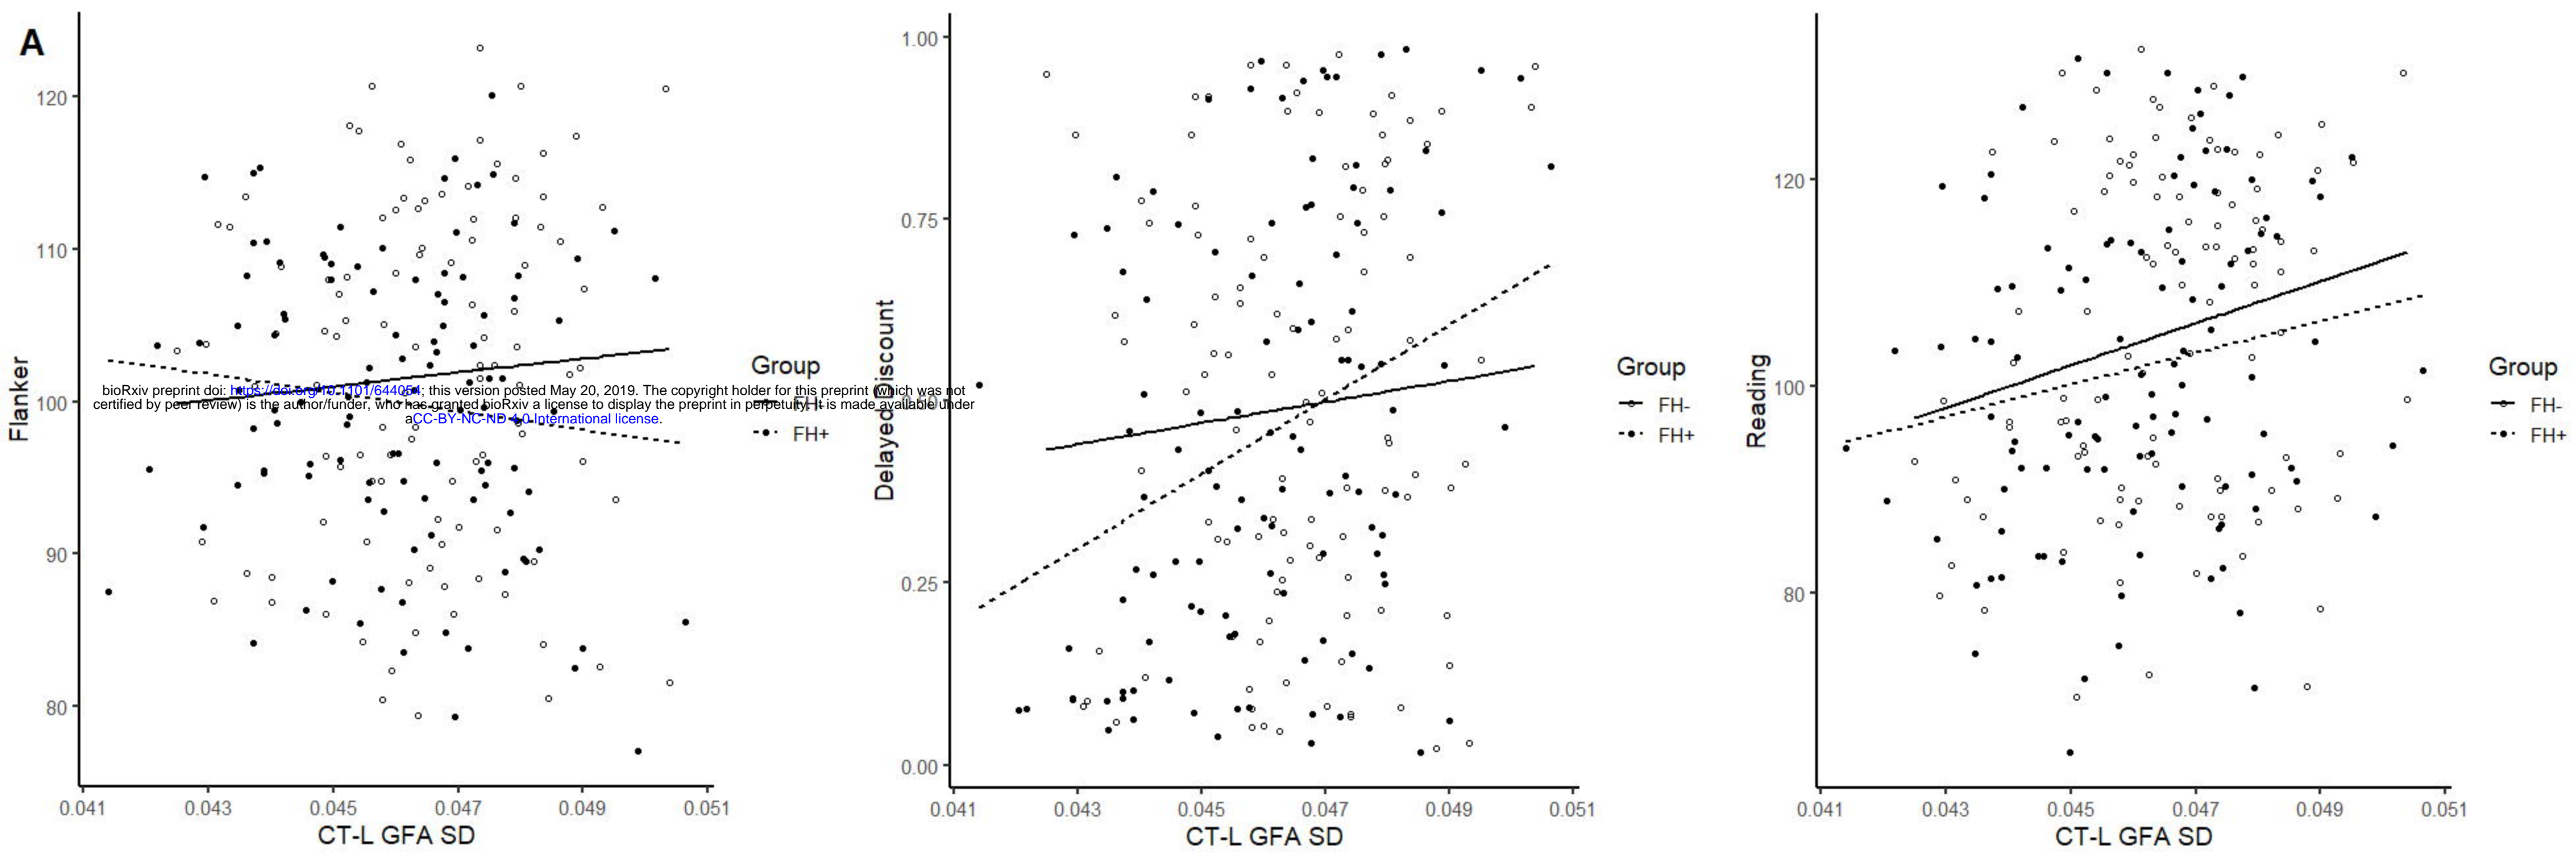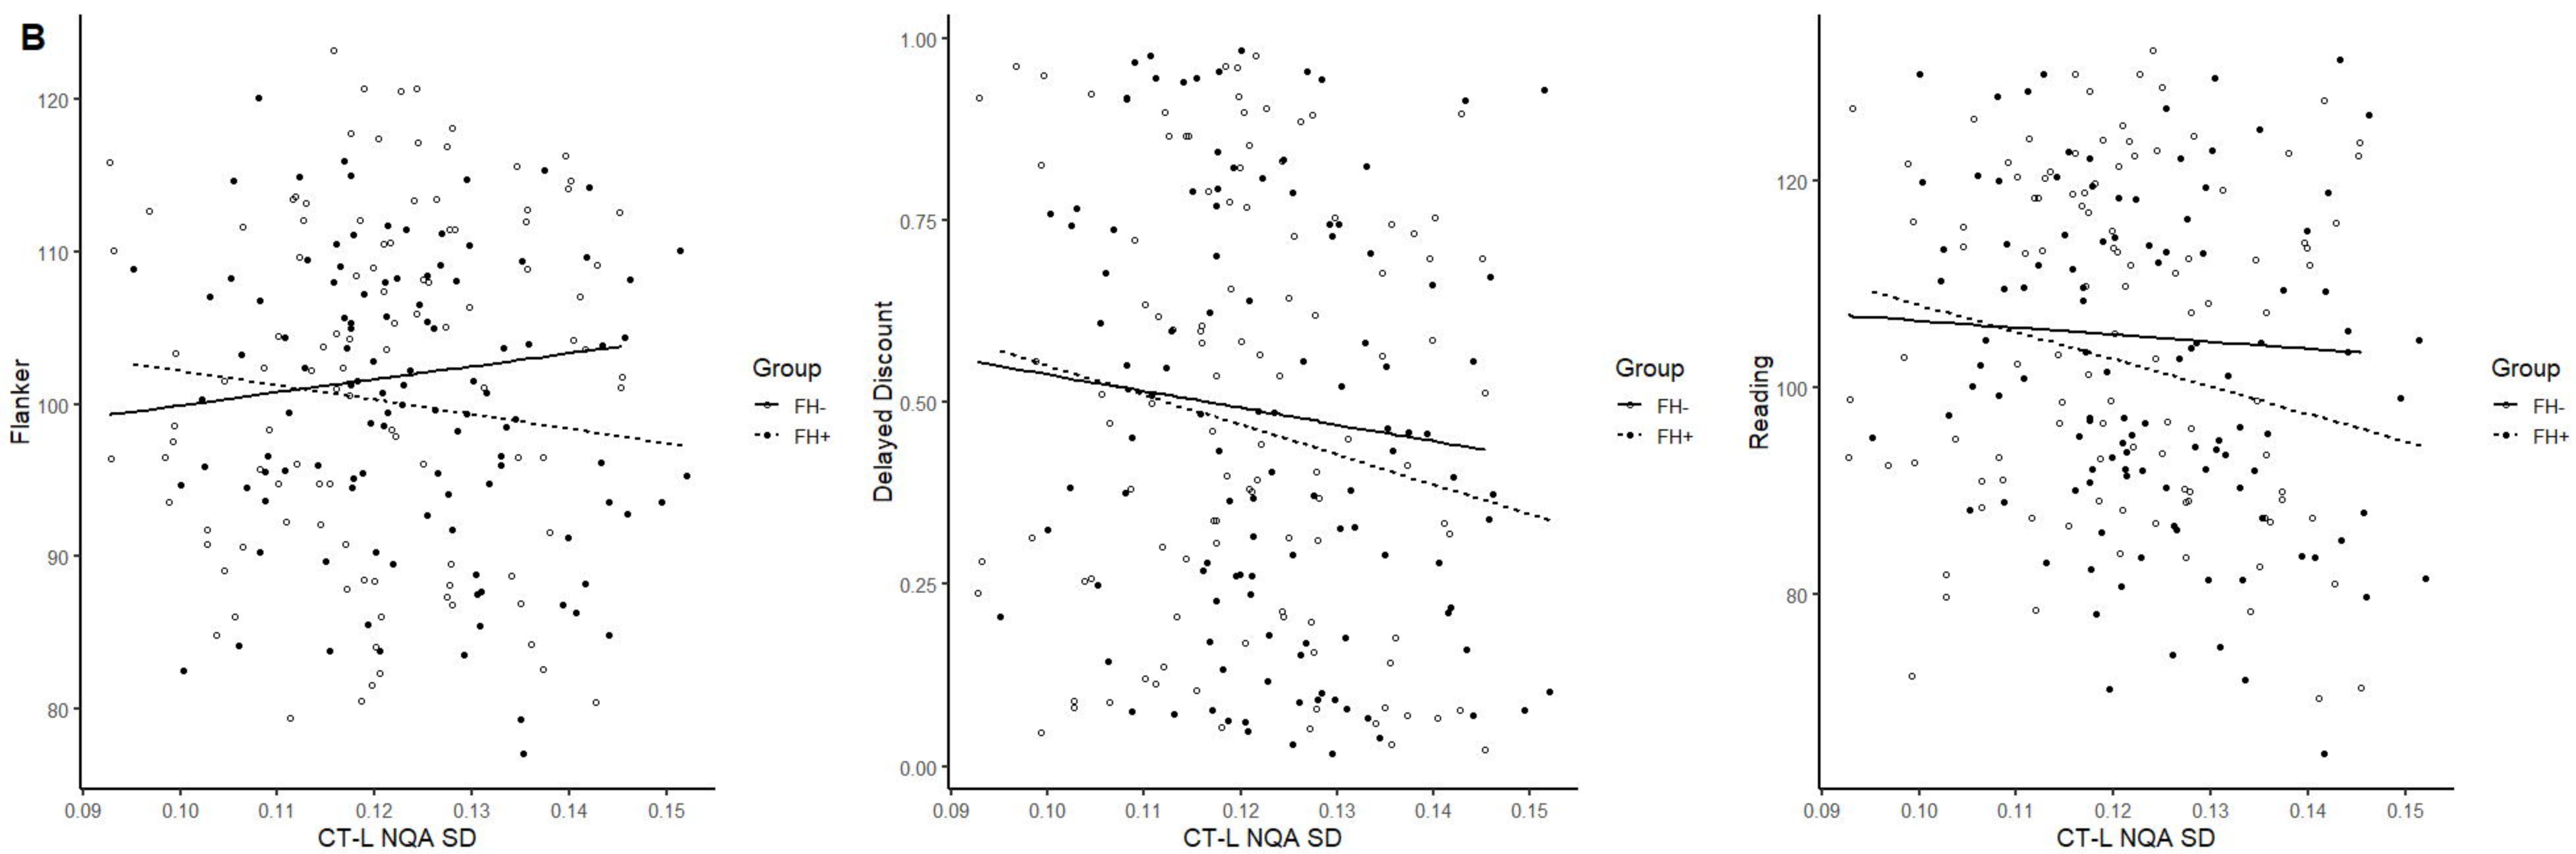

Source: https://www.biorxiv.org/content/10.1101/644054v1.full.pdf
